1 **NeutrobodyPlex - Nanobodies to monitor a SARS-CoV-2 neutralizing immune response**

2

3 *Teresa R. Wagner<sup>1,2</sup>, Philipp D. Kaiser<sup>2</sup>, Marius Gramlich<sup>2</sup>, Matthias Becker<sup>2</sup>, Bjoern Traenkle<sup>2</sup>,*  
4 *Daniel Junker<sup>2</sup>, Julia Haering<sup>2</sup>, Alex Dulovic<sup>2</sup>, Helen Schweizer<sup>3</sup>, Stefan Nueske<sup>3</sup>, Armin*  
5 *Scholz<sup>3</sup>, Anne Zeck<sup>2</sup>, Katja Schenke-Layland<sup>2,4,6,7</sup>, Annika Nelde<sup>4,8,9</sup>, Monika Strengert<sup>11,12</sup>,*  
6 *Juliane S. Walz<sup>4,8,9,10</sup>, Natalia Ruetalo<sup>5</sup>, Michael Schindler<sup>5</sup>, Nicole Schneiderhan-Marra<sup>2</sup> and*  
7 *Ulrich Rothbauer<sup>1,2,4#</sup>*

8

9 Addresses

10 <sup>1</sup> Pharmaceutical Biotechnology, Eberhard Karls University Tuebingen, Germany

11 <sup>2</sup> Natural and Medical Sciences Institute at the University of Tuebingen, Germany

12 <sup>3</sup> Livestock Center of the Faculty of Veterinary Medicine, Ludwig Maximilians University  
13 Munich, Oberschleissheim, Germany

14 <sup>4</sup> Cluster of Excellence iFIT (EXC2180) "Image-Guided and Functionally Instructed Tumor  
15 Therapies", University of Tuebingen, Tuebingen, Germany

16 <sup>5</sup> Institute for Medical Virology and Epidemiology of Viral Diseases, University Hospital,  
17 Tuebingen, Germany

18 <sup>6</sup> Department of Women's Health, Research Institute for Womens's Health, Eberhard-Karls-  
19 University, Tuebingen, Germany

20 <sup>7</sup> Department of Medicine/Cardiology, Cardiovascular Research Laboratories, David Geffen  
21 School of Medicine at UCLA, Los Angeles, CA, USA

22 <sup>8</sup> Clinical Collaboration Unit Translational Immunology, German Cancer Consortium (DKTK),  
23 Department of Internal Medicine, University Hospital Tuebingen, Tuebingen, Germany

24 <sup>9</sup> Institute for Cell Biology, Department of Immunology, University of Tuebingen, Tuebingen,  
25 Germany

26 <sup>10</sup> Department of Hematology, Oncology, Clinical Immunology and Rheumatology, University  
27 Hospital Tuebingen, Tuebingen, Germany

28 <sup>11</sup> Department of Epidemiology, Helmholtz Centre for Infection Research, Braunschweig,  
29 Germany

30 <sup>12</sup> TWINCORE GmbH, Centre for Experimental and Clinical Infection Research, a joint venture  
31 of the Hannover Medical School and the Helmholtz Centre for Infection Research, Hannover,  
32 Germany

33

34 # corresponding author

35

36 Correspondence:

37 Prof. Dr. Ulrich Rothbauer, Natural and Medical Sciences Institute at the University of  
38 Tuebingen

39 Markwiesenstr. 55, 72770 Reutlingen, Germany.

40 E-mail: [ulrich.rothbauer@uni-tuebingen.de](mailto:ulrich.rothbauer@uni-tuebingen.de)

41 Phone: +49 7121 51530-415

42 Fax: +49 7121 51530-816

43 Orcid ID: 0000-0001-5923-8986

44

45 **Abstract**

46 As the COVID-19 pandemic escalates, the need for effective vaccination programs, diagnosis  
47 tools and therapeutic intervention ever increases. Neutralizing binding molecules have become  
48 important tools for acute treatment of COVID-19 and also provide a unique possibility to  
49 monitor the emergence and presence of a neutralizing immune response in infected or  
50 vaccinated individuals. Here we identified 11 unique nanobodies (Nbs) with high binding  
51 affinities to the SARS-CoV-2 spike receptor domain (RBD). Of these, 8 effectively block the  
52 RBD:ACE2 interface. Via competitive binding analysis and detailed epitope mapping, we  
53 grouped all Nbs into 3 sets and demonstrated their neutralizing effect. Combinations from  
54 different sets showed a profound synergistic effect by simultaneously targeting different  
55 epitopes within the RBD. Finally, we established a competitive multiplex binding assay  
56 (“NeutrobodyPlex”) enabling the detection of neutralizing antibodies in serum of infected  
57 patients. Overall, our Nbs have high potential for prophylactic and therapeutic options and  
58 provide a novel approach to screen for a neutralizing immune response in infected or  
59 vaccinated individuals, helping to monitor immune status or guide vaccine design.

60

## 61 **Introduction**

62 As of mid-September 2020, the COVID-19 pandemic has caused the death of more than  
63 900,000 people worldwide and the current lack of a cure or approved vaccine comes with  
64 severe lockdowns and dramatic economic losses. Neutralizing antibodies targeting the  
65 causative agent of the disease, severe acute respiratory syndrome coronavirus 2 (SARS-CoV-  
66 2), are of substantial interest for prophylactic and therapeutic options and could help guide  
67 vaccine design <sup>1</sup>. These antibodies prevent cellular entry of SARS-CoV-2 via the angiotensin  
68 converting enzyme II (ACE2) expressed on human epithelial cells of the respiratory tract by  
69 binding to the receptor-binding domain (RBD) located within the homotrimeric transmembrane  
70 spike glycoprotein (spike) <sup>2</sup>. Since the outbreak of the pandemic, a constantly growing number  
71 of neutralizing antibodies targeting the RBD of SARS-CoV-2 has been identified from COVID-  
72 19 patients <sup>1,3</sup> underlining the importance of RBD-specific antibodies in blocking the  
73 RBD:ACE2 interaction site for the development of a protective immune response <sup>4</sup>. A promising  
74 alternative to conventional antibodies (IgGs) are single-domain antibodies (nanobodies, Nbs)  
75 derived from the heavy-chain antibodies of camelids (**Figure 1**). Due to their small size and  
76 compact folding, Nbs show high chemical stability, solubility and fast tissue penetration. By  
77 using a targeted screening approach, Nbs can be selected against different epitopes on the  
78 same antigen and easily converted into multivalent formats <sup>5</sup>. In comparison to antibodies, Nbs  
79 have similar specificities and affinities but very low immunogenicity, due to their high homology  
80 with human antibody (VH) fragments. VHH-72 has already been reported as the first cross-  
81 reactive Nb that binds the RBD of SARS-CoV-1 and SARS-CoV-2 <sup>6</sup>. Since this initial  
82 publication, several SARS-CoV-2 RBD specific Nbs have been identified from naïve/ synthetic  
83 libraries <sup>7-9</sup> or immunized animals <sup>10-14</sup>. However, very few Nbs that display high affinities in the  
84 monovalent format, have been identified <sup>8,10</sup>. Most of them have to be converted into  
85 multivalents or modified via Fc fusion in order to efficiently block virus entry <sup>6,7</sup>. This limits the  
86 potential development and applications of such Nbs since protein size is distinctly increased  
87 and Fc fusions bear the risk of unwanted antibody-dependent enhancement (ADE) in patients.  
88 Due to observed variants of SARS-CoV-2 <sup>15,16</sup>, high affinity Nbs addressing multiple epitopes

89 within the RBD must be selected to ensure sufficient neutralization potency of virus harboring  
90 sequential and/ or structural changes in their docking site.

91 Here we describe the selection of 11 unique Nbs derived from an alpaca immunized with  
92 glycosylated SARS-CoV-2 RBD. Employing a multiplex *in vitro* binding assay and detailed  
93 epitope mapping we identified Nbs which effectively block the interaction between RBD, S1-  
94 domain and the homotrimeric spike protein with ACE2. All biochemically identified inhibitory  
95 Nbs show strong neutralization of SARS-CoV-2 in a human cell model. By testing combinations  
96 of different Nbs in both functional assays, we achieved substantially improved IC<sub>50</sub> values  
97 indicating a highly synergistic effect of Nbs targeting simultaneously different epitopes within  
98 the RBD:ACE2 interface. Finally, we established a competitive multiplex binding assay, termed  
99 NeutrobodyPlex, which we successfully applied to monitor the presence of antibodies  
100 addressing the RBD:ACE2 interface in convalescent patient samples. According to previous  
101 findings these antibodies were defined as neutralizing antibodies <sup>9,17,18</sup>. Based on the data  
102 presented here, we propose that our Nbs have a high potential for prophylactic and therapeutic  
103 options. Moreover, the NeutrobodyPlex provides a novel high-throughput approach to screen  
104 for a neutralizing immune response in infected or vaccinated individuals, helping to monitor  
105 immune status of large populations or guide vaccine design and vaccination campaigns.

106

## 107 **Results**

### 108 *Selection of Nbs binding to the RBD of SARS-CoV-2*

109 To generate Nbs directed against the RBD of SARS-CoV-2 we expressed and purified RBD in  
110 mammalian (Expi293) cells<sup>19</sup> and immunized an alpaca (*Vicugna pacos*) following a 64-day  
111 immunization protocol. Subsequently, we generated a Nb phagemid library comprising ~ 4 x  
112 10<sup>7</sup> clones representing the full repertoire of variable heavy chains of heavy-chain antibodies  
113 (V<sub>H</sub>Hs or Nbs) derived from the animal. The library was subjected to phage display and  
114 biopanning was performed using either passively adsorbed or biotinylated RBD immobilized  
115 on streptavidin plates. After two phage display cycles, we analyzed 492 individual clones in a  
116 solid-phase phage ELISA and identified 325 positive binders. Sequence analysis of 72 clones  
117 revealed 11 unique Nbs which cluster in eight families with highly diverse complementarity  
118 determining regions (CDR) 3 (**Figure 2 A**). Individual Nbs were cloned with a C-terminal His<sub>6</sub>-  
119 tag, expressed in *Escherichia coli* (*E.coli*) and purified using immobilized metal ion affinity  
120 chromatography (IMAC) followed by size exclusion chromatography (SEC) (**Figure 2 B**). For  
121 affinity measurements, we used biolayer interferometry and immobilized biotinylated RBD on  
122 the sensor tip. Incubation with serial dilutions of the Nbs revealed K<sub>D</sub> values ranging from ~1.3  
123 nM to ~53 nM indicating a strong binding of the Nbs in their monovalent format. NM1225  
124 revealed a binding affinity in the micromolar range and was therefore not considered for further  
125 analysis. (**Figure 2 C, Supplementary Figure 1**).

126

### 127 *Nbs compete with ACE2 for binding to RBD, S1 domain or homotrimeric spike*

128 Next, we analyzed the potential of the Nbs to block the interaction between homotrimeric spike,  
129 S1 domain or RBD to ACE2. We utilized an in-house developed multiplex binding assay for  
130 which we first covalently coupled the respective SARS-CoV-2 derived proteins on spectrally  
131 distinct populations of paramagnetic beads (MagPlex Microspheres)<sup>20</sup>. For parallelized  
132 analysis these beads were pooled and simultaneously incubated with biotinylated ACE2 and  
133 dilutions of purified Nbs ranging from 2 μM to 12.3 pM. To screen for inhibitory Nbs, residual  
134 binding of ACE2 to distinct viral antigens was detected on a Luminex instrument using R-

135 phycoerythrin (PE)-labeled streptavidin after stringent washing. Additionally, a non-specific Nb  
136 (GFP-Nb, negative control) and two inhibiting mouse antibodies (positive controls) were  
137 analyzed <sup>21</sup>. Data obtained by this multiplex binding assay showed that 8 of the 10 analyzed  
138 Nbs inhibit ACE2 binding to isolated RBD, S1 domain and homotrimeric spike. IC<sub>50</sub> values  
139 calculated for inhibition of ACE2:RBD interaction ranges between 0.5 nM for NM1228 and 38  
140 nM for NM1229 (**Figure 3**). Notably, IC<sub>50</sub> values obtained for the most potent inhibitory Nbs  
141 NM1228 (0.5 nM), NM1226 (0.85 nM) and NM1230 (2.12 nM) are highly comparable to IC<sub>50</sub>  
142 values measured for the mouse IgGs (MM43: 0.38 nM; MM57: 3.22 nM). Additionally, the  
143 assay revealed that all Nbs except NM1224, show a similarly strong inhibitory effect of ACE2  
144 binding to all tested antigens. NM1224 seems to exclusively inhibit RBD:ACE2 interaction and  
145 does not prevent binding of ACE2 to either the homotrimeric Spike or the S1 domain.

146

#### 147 *Epitope binning*

148 After identifying RBD-specific Nbs which have an inhibitory effect on ACE2 binding, we  
149 investigated the relative location of their epitopes within the RBD. Firstly, we first performed  
150 epitope binning experiments of Nb combinations using biolayer interferometry. After coating  
151 sensors with biotinylated RBD, a Nb was loaded until binding saturation was reached, followed  
152 by a short dissociation step to remove excess Nb. A second Nb from a different family was  
153 then exposed to the RBD-Nb-complex. Using this approach, we identified Nbs which recognize  
154 overlapping and non-overlapping epitopes on RBD (**Figure 4, Supplementary Figure 2**). As  
155 expected Nbs with only minor differences in their CDR3 (NM1221, NM1222 and NM1230, Nb-  
156 Set 2) were suggested to recognize an identical or highly similar epitope as they cannot bind  
157 simultaneously to RBD. Our analysis revealed that Nbs with highly diverse CDR3s such as  
158 NM1228, NM1226, NM1227 and NM1229 could not bind simultaneously, suggesting that these  
159 Nbs recognize similar or at least overlapping epitopes. As a result, we clustered these diverse  
160 Nbs in Nb-Set 1. Overall, we identified five distinct Nbs-Sets, comprising at least one candidate  
161 targeting a different epitope within the RBD compared to any member of a different Nb-Set  
162 (**Figure 4**).

163 *Epitope mapping of RBD binding Nbs*

164 Next, we performed Hydrogen-Deuterium Exchange Mass Spectrometry (HDX-MS) with the  
165 most potent inhibitory Nbs selected from the different Nb-Sets. This allowed us to more  
166 precisely locate their binding sites at the surface of RBD and compare with the RBD:ACE2  
167 interface. Both members of Nb-Set1, NM1226 and NM1228, interacted with the RBD at the  
168 back/ lower right site (Back View, **Figure 5**). Notably, the binding site of NM1226 does not  
169 encompass amino acid residues involved in the RBD:ACE2 interface. In contrast, NM1228  
170 (Nb-Set1) as well as NM1230 (Nb-Set2) contacted the RBD at amino acid residues overlapping  
171 with the RBD:ACE2 binding interface, whereas NM1230 additionally covers parts of the spike-  
172 like loop region on one edge of the ACE2 interface at the top front/ lower left side (Front View,  
173 **Figure 5**). In accordance with our binning studies, Nbs from both Sets do not share overlapping  
174 epitopes. As expected, NM1221 and NM1222 (both Nb-Set2) addressed similar RBD regions  
175 compared to NM1230 (**Supplementary Figure 3**). NM1224 (Nb-Set4) showed an interaction  
176 distinct from all other Nbs, covering both its main binding region located at the lower right side  
177 (Front View, **Figure 5**) and residues in the ACE2:RBD interface (upper left corner, Front View,  
178 **Figure 5**). As negative control, we analyzed the non-inhibitory NM1223 (Nb-Set3) (**Figure 5**)  
179 which did not contact any amino acid residues involved in the RBD:ACE2 interface but rather  
180 binds to the opposite site (Front View, **Figure 5**). Comparing the data from epitope binning  
181 with the HDX-MS results, provides structural insights into the mechanism by which non-  
182 competing pairs of Nbs can simultaneously bind the RBD. Interestingly, the combination of  
183 NM1228 (Nb-Set1) with NM1230 (Nb-Set2) shows near complete coverage of the ACE2  
184 interface (**Figure 5**) whereas the observed inhibitory effect of NM1226 might be due to steric  
185 hindrance. From these findings, we proposed that the combination of Nb-Set1 with Nb-Set2  
186 might act synergistically on the inhibition of the interaction between RBD and ACE2.

187

188 *RBD Nbs potentially neutralize the SARS-CoV-2*

189 After identification of Nbs which inhibit the RBD:ACE2 interaction biochemically, we employed  
190 a cell-based viral infection assay to test for their neutralization potency. To this end, human



191 Caco-2 cells were co-incubated with the icSARS-CoV-2-mNG strain and serial dilutions of the  
192 inhibitory Nbs NM1224, NM1226, NM1228 and NM1230. 48 h post-infection neutralization  
193 potency was determined via automated fluorescence-microscopy of fixed and nuclear-stained  
194 cells (**Supplementary Figure 4**). Percentage of the infection rate following Nb treatment  
195 normalized to a non-treated control was plotted and IC<sub>50</sub> values were determined via sigmoidal  
196 inhibition curve fits. Overall, data obtained from the multiplex binding assay and the viral  
197 infection assay were broadly consistent. Representatives of Nb-Set1, NM1226 and NM1228,  
198 showed the highest neutralization potency with IC<sub>50</sub> values of ~15 nM and ~7 nM followed by  
199 NM1230 (~37 nM) and NM1224 (~256 nM). As expected, NM1223 (Nb-Set3) was not found to  
200 neutralize SARS-CoV-2.

201 Considering that Nbs targeting diverse epitopes within the RBD:ACE2 interface are beneficial  
202 in both reducing viral infectivity and preventing mutational escape, we next combined the most  
203 potent inhibitory and neutralizing candidates derived from Nb-Set1 (NM1226, NM1228) and  
204 Nb-Set2 (NM1230) and examined their response in both the multiplex binding assay and viral  
205 infection assay. In the multiplex binding assay the combination of NM1226 and NM1230  
206 showed an increased effect in competing with ACE2 binding to RBD illustrated by a IC<sub>50</sub> of  
207 0.42 nM which is 2- or 5-fold lower compared to treatment with individual NM1226 or NM1230,  
208 respectively (**Figure 7 A**). Notably, the IC<sub>50</sub> measured for the combination of NM1228 and  
209 NM1230 did not exceed the IC<sub>50</sub> identified for NM1228 alone indicating that NM1228 by its own  
210 has a very high inhibiting effect (**Figure 7 A**). When we tested both combinations in the viral  
211 infection assay, we observed significantly improved effects in both as illustrated by an IC<sub>50</sub> of  
212 ~4 nM for the combination NM1226 and NM1230 and ~3.5 nM for NM1228 and NM1230  
213 (**Figure 7 B, Supplementary Figure 5**). From these findings we conclude, that a combinatorial  
214 treatment with two Nbs targeting different epitopes within the RBD:ACE2 interaction site is  
215 beneficial for viral neutralization.

216

217

218 *NeutrobodyPlex - High-throughput detection of neutralizing antibodies in serum samples of*  
219 *patients after SARS-CoV-2 infection*

220 Recently, several serological assays analyzing the immune response in infected and  
221 recovered SARS-CoV-2 patients have been published<sup>19,20,22-24</sup>. These assays provide data on  
222 the presence and distribution of antibody subtypes against SARS-CoV-2 within serum  
223 samples. However, while those testing systems detect the overall antibody response against  
224 distinct antigens of SARS-CoV-2, they do not provide information to the most relevant question  
225 of whether the tested individuals carry neutralizing antibodies preventing reinfection. In this  
226 context, multiple studies have convincingly shown that neutralizing antibodies preferable bind  
227 to the RBD domain and sterically inhibit viral entry via ACE2<sup>1,3</sup>. From this, we can assume that  
228 our RBD Nbs covering large parts of the RBD:ACE2 interface might be suitable to monitor the  
229 emergence and presence of neutralizing antibodies in patients. To test this hypothesis, we set  
230 up a high-throughput competitive binding assay, termed NeutrobodyPlex, by combining our  
231 most potent neutralizing Nb combinations with a recently developed, automatable multiplex  
232 immunoassay (**Figure 8 A**)<sup>20</sup>. We incubated our previously generated color-coded beads  
233 comprising RBD, S1 domain or homotrimeric spike with serum samples from patients or non-  
234 infected individuals, in addition to dilution series of the combinations NM1226/ NM1230 or  
235 NM1228/ NM1230 and used this to detect patient-derived IgGs bound to the respective  
236 antigens. Depending on the Nb concentration, neutralizing antibodies targeting the RBD:ACE2  
237 interaction site within the serum samples are displaced resulting in a reduction of the  
238 detectable signal (**Figure 8 A**).

239 When analyzing RBD specific IgGs from serum samples, we detected a distinct signal  
240 reduction in the presence of increasing Nb concentrations for all tested samples (**Figure 8 B,**  
241 **Supplementary Figure 6 A**) indicating that all patients comprise a substantial fraction of RBD-  
242 reactive IgGs targeting the RBD:ACE2 interface. Notably, we observed no changes when  
243 analyzing competitive binding for IgGs addressing the homotrimeric spike protein, which  
244 suggests the presence of multiple IgGs targeting epitopes beyond the RBD:ACE2 interaction  
245 site (**Figure 8 B, Supplementary Figure 6 A**).

246 To further demonstrate that our approach is able to determine the presence of IgGs targeting  
247 the RBD:ACE2 interaction site in detailed resolution, we highlight here the effect of competing  
248 Nbs on two selected serum samples #289 and #265. In both cases a clear displacement of  
249 IgGs could be observed when measuring binding to RBD, however using the S1 domain as  
250 target antigen distinct differences between both serum samples became visible. While #289  
251 comprise a substantial fraction of IgGs addressing the RBD:ACE2 interface also presented by  
252 the S1 domain, in sample #265 IgGs binding to additional epitopes of the S1 domain cover the  
253 detectable signal reduction derived from displaced IgGs (**Figure 8 C, Supplementary Figure**  
254 **6 B**). Additionally, we compared our NeutrobodyPlex approach using RBD-specific Nbs with  
255 conventional antibodies by applying the neutralizing mouse antibody MM43<sup>21</sup> in a similar  
256 setting. Here we detected substantial cross-reactive signals from the labeled anti-human-IgG  
257 in all five serum samples (**Supplementary Figure 6 C**). From those findings we assume, that  
258 conventional antibodies are not suitable, could be falsely detected.

259 Finally, we validated our NeutrobodyPlex by analyzing a cohort of 18 serum samples of  
260 convalescent SARS-CoV-2 patients and four control samples from healthy donors using one  
261 consistent Nb concentration (1.26  $\mu$ M). All donors infected with SARS-CoV-2 showed the  
262 presence of neutralizing antibodies, most clearly visible when using RBD as antigen (**Figure 9**  
263 **A, Supplementary Figure 7**). For direct comparison we performed a cell-based viral infection  
264 assay as the gold standard for detecting neutralizing serum antibodies<sup>25</sup>. Thus, we tested the  
265 same samples in dilution series using the previously described icSARS-CoV-2-mNG strain in  
266 Caco-2 cells (**Figure 9 B**). The viral infection assay revealed the presence of neutralizing  
267 antibodies in the same sample set derived from convalescent SARS-CoV-2 patients, whereas  
268 none of the samples from healthy donors showed any effect. Observable differences between  
269 the patient samples can be explained by different antibody titers, which were not investigated  
270 further. In summary, our findings showed that both screening assays provide consistent  
271 information and demonstrate the suitability of our NeutrobodyPlex using RBD as the most  
272 relevant antigen to reliably monitor the presence of neutralizing antibodies in patients.

273

## 274 Discussion

275 Indisputably, there is a strong need for diagnostic tools and therapeutics against SARS-CoV-  
276 2 infection. As demonstrated for neutralizing antibodies selected from convalescent COVID-  
277 19 patients, biologically-derived binding molecules can effectively address the large interaction  
278 site of the RBD domain of SARS-CoV-2 and the ACE2 receptor exposed on human epithelial  
279 cells of the respiratory tract <sup>1,3,17,18</sup>. A promising alternative to conventional antibodies are Nbs  
280 derived either from naïve/ synthetic libraries or immunized camelids <sup>26</sup>. By employing suitable  
281 screening strategies, Nbs addressing predefined domains within larger antigens can be  
282 selected. Since the description of the first Nb shown to bind the RBD of the homotrimeric spike  
283 protein of SARS-CoV-2 <sup>6</sup>, multiple functioning Nbs targeting this particular viral domain have  
284 been identified <sup>7,8,10,11</sup>. In this study we identified 11 novel RBD-specific Nbs derived from an  
285 immunized animal (*Vicugna pacos*). Based on their sequences, these Nbs can be clustered  
286 into 8 unique families, each representing different germ lines indicating a prominent immune  
287 response towards the fully glycosylated antigen. All identified monovalent Nbs except NM1225  
288 showed affinities in the low nanomolar range. Thus, these Nbs do not require reformatting into  
289 bivalent formats e.g. by fusing to a Fc domain or by combining multiple binding sites as  
290 previously shown for other RBD targeting Nbs <sup>6,9,10,12-14</sup>.

291 For functional analysis we employed a recently developed *in vitro* multiplex binding assay <sup>20</sup> to  
292 monitor the replacement of ACE2 as the natural ligand from binding to RBD, S1 domain or  
293 homotrimeric spike upon addition of RBD-specific Nbs. With this assay, we were able to identify  
294 8 inhibiting Nbs targeting those spike-derived antigens. Interestingly, IC<sub>50</sub> values obtained for  
295 inhibitory Nbs on RBD and homotrimeric spike show a higher correlation compared to IC<sub>50</sub>  
296 values obtained for the S1 domain. Based upon detailed epitope mapping, we grouped our  
297 Nbs in 5 different Nb-Sets. 3 of those Nb-Sets, comprise inhibitory Nbs which were shown to  
298 target different epitopes within the RBD:ACE2 interaction site. We confirmed the neutralizing  
299 potency of those Nbs in a cell-based viral infection assay using fully intact SARS-CoV-2.  
300 Through this, we noted that the measurable viral neutralization effect of the individual Nbs  
301 strongly correlates to the data obtained from the biochemical screen, which demonstrates that

302 the multiplex binding assay as presented is highly relevant and suitable to identify virus  
303 neutralizing binders. As a result, we modified our previously described multiplex immunoassay  
304 (MULTICOV-AB, <sup>20</sup>) and developed a novel diagnostic test called NeutrobodyPlex to monitor  
305 the presence and the emergence of neutralizing antibodies in serum samples of SARS-CoV-2  
306 infected individuals. Using combinations of high affinity Nbs covering the RBD:ACE2 interface,  
307 we were able to directly and specifically displace IgGs present in serum samples from these  
308 particular RBD epitopes. According to previous studies, human IgGs addressing those  
309 epitopes were classified as neutralizing antibodies <sup>1,17,18</sup>. In our NeutrobodyPlex, we further  
310 demonstrated that such neutralizing antibodies can be detected best using the RBD. Larger  
311 spike-derived antigens especially the full length homotrimeric spike, which is bound by a  
312 multitude of different IgGs, could be useful to determine the fraction of neutralizing antibodies  
313 in a patient sample. We validated the suitability of our approach by testing serum samples from  
314 18 patients and four healthy donors in comparison to the classical cell-based viral infection  
315 assay. The observed strong accordance between both assays confirmed the ability of the  
316 NeutrobodyPlex to precisely monitor the presence of neutralizing antibodies within patient  
317 samples.

318 To our knowledge, the NeutrobodyPlex employing Nbs blocking the RBD:ACE2 interaction site  
319 demonstrates for the first time a multiplex, antigen-resolved analysis of the presence of human  
320 IgGs in convalescent individuals suffering from SARS-CoV-2 infection. Compared to other  
321 neutralizing serum antibody detection tests, this assay enables the analysis on an automatable  
322 high-throughput basis and is performed with non-living and non-infectious viral material thus  
323 reducing costs and safety conditions <sup>25,27</sup>. Furthermore, the NeutrobodyPlex is highly sensitive  
324 as low serum dilutions (tested dilution: 1:400) are sufficient for analysis which significantly  
325 reduces patient material compared to standard assays. Considering our findings, it is highly  
326 conceivable that the NeutrobodyPlex will open unique possibilities for a detailed classification  
327 of the individual immune status with regard to the development of protective antibodies and to  
328 monitor the efficiency of strongly needed vaccination campaigns.

329

330 **Materials and Methods**

331 **Expression constructs** For bacterial expression of Nbs, sequences were cloned into the  
332 pHEN6 vector <sup>28</sup>, thereby adding a C-terminal 6xHis-tag for IMAC purification as described  
333 previously <sup>29,30</sup>. The pCAGGS plasmids encoding the stabilized homotrimeric spike protein and  
334 the receptor binding domain (RBD) of SARS-CoV-2 were kindly provided by F. Krammer <sup>19</sup>.  
335 The cDNA encoding the S1 domain (aa 1 - 681) of the SARS-CoV-2 spike protein was obtained  
336 by PCR amplification using the forward primer S1\_CoV2-for 5'- CTT CTG GCG TGT GAC  
337 CGG - 3' and reverse primer S1\_CoV2-rev 5' - GTT GCG GCC GCT TAG TGG TGG TGG  
338 TGG TGG TGG GGG CTG TTT GTC TGT GTC TG - 3' and the full length SARS-CoV-2 spike  
339 cDNA as template and cloned into the XbaI/ NotI-digested backbone of the pCAGGS vector,  
340 thereby adding a C-terminal His<sub>6</sub>-Tag. All expression constructs were verified by sequence  
341 analysis.

342

343 **Nb libraries** Alpaca immunizations with purified RBD and Nb-library construction were carried  
344 out as described previously <sup>31</sup>. Animal immunization has been approved by the government of  
345 Upper Bavaria (Permit number: 55.2-1-54-2532.0-80-14). In brief, nine weeks after  
346 immunization of an animal (*Vicugna pacos*) with either C-terminal histidine-tagged RBD (RBD-  
347 His<sub>6</sub>), ~100 ml blood were collected and lymphocytes were isolated by Ficoll gradient  
348 centrifugation using the Lymphocyte Separation Medium (PAA Laboratories GmbH). Total  
349 RNA was extracted using TRIzol (Life Technologies) and mRNA was reverse transcribed to  
350 cDNA using a First-Strand cDNA Synthesis Kit (GE Healthcare). The Nb repertoire was  
351 isolated in 3 subsequent PCR reactions using following primer combinations (1) CALL001 (5'-  
352 GTC CTG GCT GCT CTT CTA CA A GG-3') and CALL002 (5'-GGT ACG TGC TGT TGA ACT  
353 GTT CC-3') (2) forward primer set FR1-1, FR1-2, FR1-3, FR1-4 (5'-CAT GGC NSA NGT GCA  
354 GCT GGT GGA NTC NGG NGG-3', 5'-CAT GGC NSA NGT GCA GCT GCA GGA NTC NGG  
355 NGG-3', 5'-CAT GGC NSA NGT GCA GCT GGT GGA NAG YGG NGG-3', 5'-CAT GGC NSA  
356 NGT GCA GCT GCA GGA NAG YGG NGG-3') and reverse primer CALL002 and (3) forward  
357 primer FR1-ext1 and FR1-ext2 (5'-GTA GGC CCA GCC GGC CAT GGC NSA NGT GCA GCT

358 GGT GG-3', 5'-GTA GGC CCA GCC GGC CAT GGC NSA NGT GCA GCT GCA GGA-3' A-)  
359 and reverse primer set FR4-1, FR4-2, FR4-3, FR4-4, FR4-5 and FR4-6 (5'-GAT GCG GCC  
360 GCN GAN GAN ACG GTG ACC NGN RYN CC-3'. 5'-GAT GCG GCC GCN GAN GAN ACG  
361 GTG ACC NGN GAN CC-3'. 5'-GAT GCG GCC GCN GAN GAN ACG GTG ACC NGR CTN  
362 CC-3'. 5'-GAT GCG GCC GCR CTN GAN ACG GTG ACC NGN RYN CC-3'. 5'-GAT GCG  
363 GCC GCR CTN GAN ACG GTG ACC NGN GAN CC-3'. 5'-GAT GCG GCC GCR CTN GAN  
364 ACG GTG ACC NGR CTN CC-3') introducing Sfil and NotI restriction sites. The Nb library was  
365 subcloned into the Sfil/ NotI sites of the pHEN4 phagemid vector <sup>28</sup>

366

367 **Nb Screening** For the selection of RBD-specific Nbs two consecutive phage enrichment  
368 rounds were performed. Therefore, TG1 cells containing the 'immune'-library in pHEN4 were  
369 infected with the M13K07 helper phage, hence the V<sub>HH</sub> domains were presented superficially  
370 on phages. For each round 1 x 10<sup>11</sup> phages of the 'immune'-library were applied on RBD either  
371 directly coated on immunotubes (10 µg/ml) or biotinylated RBD (5 µg/ml) immobilized on 96-  
372 well plates pre-coated with Streptavidin. In each selection round extensive blocking of antigen  
373 and phages was performed by using 5% milk or BSA in PBS-T and with increasing panning  
374 round PBS-T washing stringency was intensified. Bound phages were eluted in 100 mM tri-  
375 ethylamin, TEA (pH 10.0), followed by immediate neutralization with 1 M Tris/HCl (pH 7.4). For  
376 phage preparation for following rounds, exponentially growing TG1 cells were infected and  
377 spread on selection plates. Antigen-specific enrichment for each round was monitored by  
378 comparing colony number of antigen vs. no antigen selection. Following panning 492 individual  
379 clones of the second selection round were screened by standard Phage-ELISA procedures  
380 using a horseradish peroxidase-labeled anti-M13 monoclonal antibody (GE-Healthcare).

381

382 **Protein expression and purification** RBD-specific Nbs were expressed and purified as  
383 previously published <sup>29,30</sup>. For the expression of SARS-CoV-2 proteins (RBD, stabilized  
384 homotrimeric spike and S1 domain) Expi293 cells were used as per Stadlbauer *et al.* <sup>32</sup>. For  
385 quality control all purified proteins were analyzed via SDS-PAGE according to standard

386 procedures. Briefly, protein samples were denatured (5 min, 95°C) in 2x SDS-sample buffer  
387 containing 60 mM Tris/HCl, pH 6.8; 2% (w/v) SDS; 5% (v/v) 2-mercaptoethanol, 10% (v/v)  
388 glycerol, 0.02% bromophenol blue and visualized by InstantBlue Coomassie (Expedeon)  
389 staining. For immunoblotting, proteins were transferred on nitrocellulose membrane (Bio-Rad  
390 Laboratories) and detection was performed using anti-His primary antibody (Penta-His  
391 Antibody, #34660, Qiagen) followed by donkey-anti-mouse secondary antibody labeled with  
392 AlexaFluor647 (Invitrogen) using a Typhoon Trio scanner (GE-Healthcare, Freiburg, Germany;  
393 excitation 633 nm, emission filter settings 670 nm BP 30).

394

395 **Biophysical bilayer interferometry (BLI)** To analyze the binding affinity of purified Nbs  
396 towards RBD bilayer interferometry (BLItz, ForteBio) was performed as per the  
397 manufacturer's protocols. Briefly, biotinylated RBD was immobilized on single-use high-  
398 precision streptavidin biosensors (SAX). Depending on the affinity of the RBD-Nb interaction,  
399 an appropriate concentration range (15.6 nM-2 µM) of Nbs was used. For each run, four  
400 different Nb concentrations were measured as well as a reference run using PBS instead of  
401 Nb in the association step. As negative control, GFP-Nb (500 nM) was applied in the binding  
402 studies. Global fits were determined using the BLItzPro software and the global dissociation  
403 constant ( $K_D$ ) was calculated.

404

405 **Bead-based multiplex binding/ competition assay** Purified RBD, S1 domain and  
406 homotrimeric spike of SARS-CoV-2 were covalently immobilized on spectrally distinct  
407 populations of carboxylated paramagnetic beads (MagPlex Microspheres, Luminex  
408 Corporation, Austin, TX) using 1-ethyl-3-(3-dimethylaminopropyl)carbodiimide (EDC)/ sulfo-N-  
409 hydroxysuccinimide (sNHS) chemistry. For immobilization, a magnetic particle processor  
410 (KingFisher 96, Thermo Scientific, Schwerte, Germany) was used. Bead stocks were vortexed  
411 thoroughly and sonicated for 15 seconds. Subsequently, 83 µL of 0.065% (v/v) Triton X-100  
412 and 1 mL of bead stock containing  $12.5 \times 10^7$  beads of one single bead population were  
413 pipetted into each well. The beads were then washed twice with 500 µL of activation buffer



414 (100 mM Na<sub>2</sub>HPO<sub>4</sub>, pH 6.2, 0.005% (v/v) Triton X-100) and activated for 20 min in 300 µL of  
415 activation mix containing 5 mg/mL EDC and 5 mg/mL sNHS in activation buffer. Following  
416 activation, the beads were washed twice with 500 µL of coupling buffer (500 mM MES, pH 5.0,  
417 0.005% (v/v) Triton X-100) and then proteins were added to the activated beads and incubated  
418 for 2 h at 21 °C to immobilize the antigens on the surface. Protein-coupled beads were washed  
419 twice with 800 µL of wash buffer (1x PBS, 0.005 % (v/v) Triton X-100) and were finally  
420 resuspended in 1,000 µL of storage buffer (1x PBS, 1 % (w/v) BSA, 0.05% (v/v) ProClin). The  
421 beads were stored at 4°C until further use. For bead-based multiplex assays, individual bead  
422 populations were combined into a bead mix.

423 For the bead-based ACE2 competition binding assay, Nbs were incubated with the bead-mix  
424 (containing beads coupled with SARS-CoV-2 homotrimeric spike, RBD and S1 proteins) and  
425 biotinylated ACE2 (Sino Biological) which competes for the binding of SARS-CoV-2 spike-  
426 derived antigens. Single Nbs or Nb combinations were pre-diluted to a concentration of 6.3  
427 µmol/L per Nb in assay buffer. Afterwards, a 4-fold dilution series was made over eight steps  
428 in assay buffer containing 160 ng/mL biotinylated ACE2. Subsequently, 25 µL of every dilution  
429 was transferred to 25 µL bead-mix in a 96-well half-area plate. The plate was incubated for 2  
430 h at 21 °C, shaking at 750 rpm. Beads were washed using a microplate washer (Biotek 405TS,  
431 Biotek Instruments GmbH) to remove unbound ACE2 or Nbs. R-phycoerythrin-labeled  
432 streptavidin was added and incubated for 45 minutes at 21 °C shaking at 750 rpm to detect  
433 biotinylated ACE2 that bound to the immobilized. Afterwards, the beads were washed again to  
434 remove unbound PE-labeled streptavidin. Measurements were performed with a FLEXMAP  
435 3D instrument using the xPONENT Software version 4.3 (settings: sample size: 80 µL, 50  
436 events, Gate: 7,500 – 15,000, Reporter Gain: Standard PMT).

437

438 **NeutrobodyPlex: Bead-based multiplex neutralizing antibody detection assay** Based on  
439 the recently described automatable multiplex immunoassay by Becker *et al.*<sup>20</sup>, the  
440 NeutrobodyPlex was developed and similar assay conditions were applied. For the detection  
441 of neutralizing serum antibodies, the bead-mix containing beads coupled with purified RBD,

442 S1 domain or homotrimeric spike of SARS-CoV-2 was incubated with Nb combinations  
443 (concentrations ranging from 1.26  $\mu\text{M}$  to 0.08 nM for each Nb) and serum samples of  
444 convalescent SARS-CoV-2 patients and healthy donors at a 1:400 dilution. As positive control  
445 and maximal signal detection per sample, serum only was included and as negative control for  
446 Nb binding a SARS-CoV-2-unspecific GFP nanobody (1.26  $\mu\text{M}$ ) was used. To compare Nb  
447 performance, the inhibiting mouse antibody (40591-MM43) was added in concentrations of  
448 0.17  $\mu\text{M}$  to 0.08 nM. Bound serum IgGs were detected via anti-human-IgG-PE as previously  
449 described <sup>20</sup>.

450

## 451 **Hydrogen-Deuterium Exchange**

### 452 *RBD Deuteration Kinetics and Epitope Elucidation*

453 RBD (5  $\mu\text{L}$ , 73  $\mu\text{M}$ ) was either incubated with PBS or RBD-specific Nbs (2.5  $\mu\text{L}$ , 2.5 mg/mL in  
454 PBS) at 25 °C for 10 min. Deuterium exchange of the pre-incubated nanobody-antigen  
455 complex was initiated by dilution with 67.5  $\mu\text{L}$  PBS (150 mM NaCl, pH 7.4) prepared with D<sub>2</sub>O  
456 and incubation for 5 and 50 minutes respectively at 25 °C. To ensure a minimum of 90% of  
457 complex formation, the molar ratio of antigen to Nbs was calculated according to *Kochert et al.*  
458 <sup>33</sup> using the affinity constants of 1.37 nM (NM1228), 3.66 nM (NM1226), 3.82 nM (NM1223),  
459 8.23 nM (NM1230) and 8.34 nM (NM1224) (pre-determined by BLI analysis). The final D<sub>2</sub>O  
460 concentration was 90%. After 5 and 50 min at 25 °C, aliquots of 15  $\mu\text{L}$  were taken and  
461 quenched by adding 15  $\mu\text{L}$  ice-cold quenching solution (0.2 M TCEP with 1.5% formic acid and  
462 4 M guanidine HCl in 100 mM ammonium formate solution pH 2.2) resulting in a final pH of  
463 2.5. Quenched samples were immediately snap-frozen. The immobilized pepsin was prepared  
464 by adding 60  $\mu\text{L}$  of 50% slurry (in ammonium formate solution pH 2.5) to a tube and dried by  
465 centrifugation at 1000 x g for 3 min at 0 °C and discarding the supernatant. Before injection,  
466 aliquots were thawed and added to the dried pepsin beads. Proteolysis was performed for 2  
467 min in a water ice bath followed by filtration using a 22  $\mu\text{m}$  filter and centrifugation at 1000 x g  
468 for 30 s at 0 °C. Samples were immediately injected into a LC-MS system. Undeuterated  
469 control samples were prepared under the same conditions using H<sub>2</sub>O instead of D<sub>2</sub>O. The

470 same protocol was applied for the Nbs without addition of RBD as well to create a list of peptic  
471 peptides. The HDX experiments of the RBD-Nb-complex were performed in triplicates. The  
472 back-exchange of the method as determined using a standard peptide mixture of 14 synthetic  
473 peptides was 24%.

#### 474 *Chromatography and Mass Spectrometry*

475 HDX samples were analyzed on a LC-MS system comprised of RSLC pumps (UltiMate 3000  
476 RSLCnano, Thermo Fisher Scientific, Dreieich, Germany), a chilling device for  
477 chromatography (MéCour Temperature Control, Groveland, MA, USA) and a mass  
478 spectrometer Q Exactive (Thermo Fisher Scientific, Dreieich, Germany). The chilling device  
479 contained the LC column (ACQUITY BEH C18, 1.7  $\mu\text{m}$ , 300  $\text{\AA}$ , 1 mm x 50 mm (Waters GmbH,  
480 Eschborn, Germany)), a cooling loop for HPLC solvents, a sample loop, and the injection valve  
481 and kept all components at 0 °C. Samples were analyzed using a two-step 20 min linear  
482 gradient with a flow rate of 50  $\mu\text{l}/\text{min}$ . Solvent A was 0.1% (v/v) formic acid and solvent B was  
483 80% acetonitrile (v/v) with 0.1% formic acid (v/v). After 3 min desalting at 10% B, a 9 min linear  
484 gradient from 10 to 25% B was applied followed by an 8 min linear gradient from 25 to 68.8%.  
485 Experiments were performed using a Q Exactive (Thermo Fisher Scientific, Dreieich,  
486 Germany) with 70,000 resolutions instrument configurations as follows: sheath gas flow rate  
487 of 25; aux gas flow rate of 5; S-lens RF level of 50, spray voltage of 3.5 kV and a capillary  
488 temperature of 300 °C.

#### 489 *HDX Data Analysis*

490 A peptic peptide list containing peptide sequence, retention time and charge state was  
491 generated in a preliminary LC-MS/MS experiment. The peptides were identified by exact mass  
492 and their fragment ion spectrum using protein database searches by Proteome Discoverer  
493 v2.1.0.81 (Thermo Fisher Scientific, Dreieich, Germany) and implemented SEQUEST HT  
494 search engine. The protein database contained the RBD and the pepsin sequences. Precursor  
495 and fragments mass tolerance were set to 6 ppm and 0.05 Da, respectively. No enzyme  
496 selectivity was applied, however, identified peptides were manually evaluated to exclude  
497 peptides originated through cleavage after arginine, histidine, lysine, proline and the residue

498 after proline<sup>34</sup>. FDR was estimated using q-values calculated by Percolator and only peptides  
499 with high-confidence identification (q-value  $\leq$  0.01) were included to the list. Peptides with  
500 overlapping mass, retention time and charge in Nb and antigen digest, were manually  
501 removed. The deuterated samples were recorded in MS mode only and the generated peptide  
502 list was imported into HDEaminer v2.5.0 (Sierra Analytics, Modesto, CA, USA). Deuterium  
503 uptake was calculated using the increase of the centroid mass of the deuterated peptides.  
504 HDX could be followed for 79% of the RBD amino acid sequence. The calculated percentage  
505 deuterium uptake of each peptide between RBD-Nb and RBD-only were compared. Any  
506 peptide with uptake reduction of 5% or greater upon Nb binding was considered as protected.

507

508 **Cell culture** Caco-2 (Human Colorectal adenocarcinoma) cells were cultured at 37°C with 5%  
509 CO<sub>2</sub> in DMEM containing 10% FCS, 2 mM l-glutamine, 100 µg/ml penicillin-streptomycin and  
510 1% NEAA.

511

512 **Viruses** All experiments associated with the SARS-CoV-2 virus were conducted in Biosafety  
513 Level 3 laboratory. The recombinant SARS-CoV-2 expressing mNeonGreen (icSARS-CoV-2-  
514 mNG) (PMID: 32289263) was obtained from the World Reference Center for Emerging Viruses  
515 and Arboviruses (WRCEVA) at the UTMB (University of Texas Medical Branch). To generate  
516 icSARS-CoV-2-mNG stocks, 200,000 Caco-2 cells were infected with 50 µl of virus in a 6-well  
517 plate, the supernatant was harvested 48 hpi, centrifuged, and stored at -80°C. For MOI  
518 determination, a titration using serial dilutions of the mNeonGreen (icSARS-CoV-2-mNG) was  
519 conducted. The number of infectious virus particles per ml was calculated as the (MOI × cell  
520 number) / (infection volume), where  $MOI = -\ln(1 - \text{infection rate})$ .

521

522 **Viral infection assay** For neutralization experiments,  $1 \times 10^4$  Caco-2 cells/well were seeded in  
523 96-well plates the day before infection in media containing 5% FCS. Caco-2 cells were co-  
524 incubated with the SARS-CoV-2 strain icSARS-CoV-2-mNG at a MOI=1.1 and Nbs or serum  
525 samples in serial dilutions in the indicated concentrations. 48 hpi cells were fixed with 2% PFA

526 and stained with Hoechst33342 (1  $\mu\text{g}/\text{mL}$  final concentration) for 10 minutes at 37°C. The  
527 staining solution was removed and exchanged for PBS. For quantification of infection rates,  
528 images were taken with the Cytation3 (Biotek) and Hoechst+ and mNG+ cells were  
529 automatically counted by the Gen5 Software (Biotek). Infection rate was determined by dividing  
530 the number of infected cells through total cell count per condition. Data were normalized to  
531 respective virus-only infection control. Inhibitory concentration 50 ( $\text{IC}_{50}$ ) was calculated as the  
532 half-maximal inhibitory dose using 4-parameter nonlinear regression (GraphPad Prism).

533

534 **Patient samples** A total of 23 serum samples from SARS-CoV-2 convalescent patients (#xxx)  
535 and 4 healthy donors (C1-4) were analyzed in the course of this study. All samples used were  
536 de-identified and pre-existing. Ethical consent was granted from the Ethics Commission of the  
537 University of Tuebingen under the votum 179/2020/BO2. Samples were classified as SARS-  
538 CoV-2 infected, based upon a self-reported positive SARS-CoV-2 RT-PCR result.

539

540 **Analyses and Statistics** Graph preparation and statistical analysis was performed using the  
541 GraphPad Prism Software (Version 8.3.0).

542

543

544 **Data availability**

545 The data that support the findings of this study are available from the corresponding authors  
546 upon reasonable request.

547

548 **Authorship Contributions**

549 N.S.M., T.R.W., M.B. and U.R. designed the study; P.D.K., B.T., T.R.W. performed Nb  
550 selection and biochemical characterization; H.S., S.N., A.S. immunized the animal; J.H., D.J.,  
551 M.B., performed the multiplex binding assay; M.G., A.Z. performed HDX-MS experiments;  
552 Mo.S., G.K. A.N., J.S.W. and K.S.L. organize and provide patient samples; N.B., M.S.  
553 performed viral infection assays; T.W., M.B., J.H., M.G., A.Z., N.B., M.S. and U.R. analyzed  
554 data and performed statistical analysis. T.R.W., A.D. and U.R. drafted the manuscript; N.S.M.,  
555 U.R. supervised the study. All authors critically read the manuscript.

556

557

558 **Figures:**

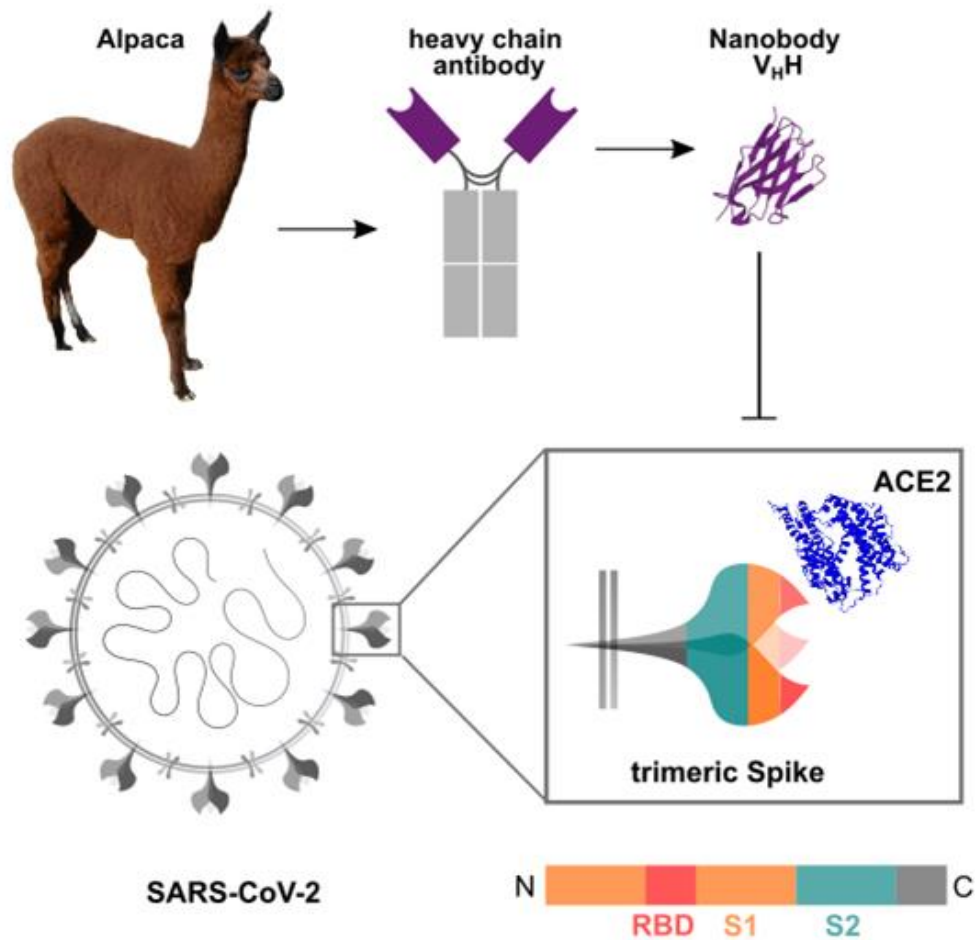

559

560 **Figure 1 Generation of nanobodies blocking the SARS-CoV-2 RBD:ACE2 interface**

561 Nanobodies (Nbs) are genetically engineered from heavy-chain only antibodies of alpacas.

562 The interaction between the SARS-CoV-2 homotrimeric spike protein and ACE2 can be

563 blocked by RBD-specific Nbs. Protein structures adapted from PDB 3OGO (Nb) and 6CS2

564 (ACE2).

565

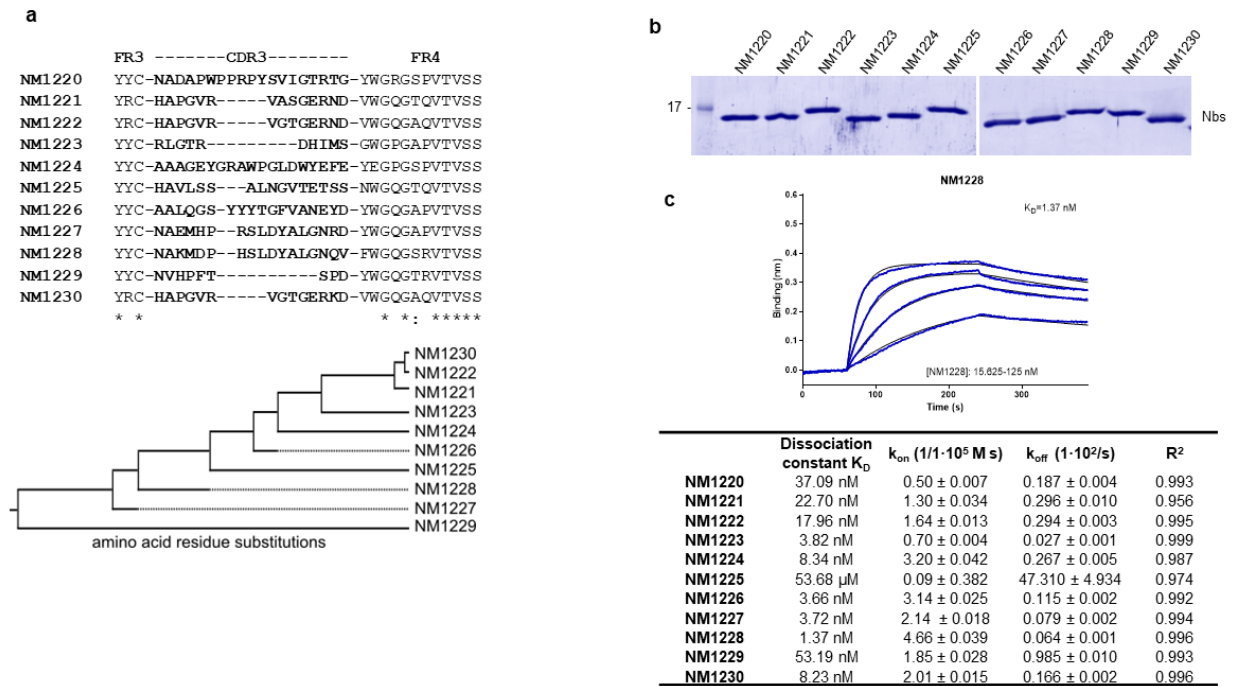

566

## 567 **Figure 2: Characteristics of RBD-specific Nbs**

568 **(A)** Amino acid sequences of the complementarity determining region (CDR) 3 from unique  
569 Nbs selected after two rounds of biopanning are listed (upper panel). Phylogenetic tree based  
570 on a ClustalW alignment of the CDR3 sequences is shown (lower panel). **(B)** Recombinant  
571 expression and purification of Nbs using immobilized metal affinity chromatography (IMAC)  
572 and size exclusion chromatography (SEC). Coomassie staining of 2  $\mu$ g of purified Nbs is  
573 shown **(C)** For biolayer interferometry based affinity measurements, biotinylated RBD was  
574 immobilized on streptavidin biosensors. Kinetic measurements were performed by using four  
575 concentrations of purified Nbs ranging from 15.6 nM - 2  $\mu$ M. As an example, the sensogram of  
576 NM1228 at indicated concentrations is shown (upper panel). The table summarizes affinities  
577 ( $K_D$ ), association ( $K_{on}$ ) and dissociation constants ( $K_{off}$ ) determined for individual Nbs (lower  
578 panel).

579



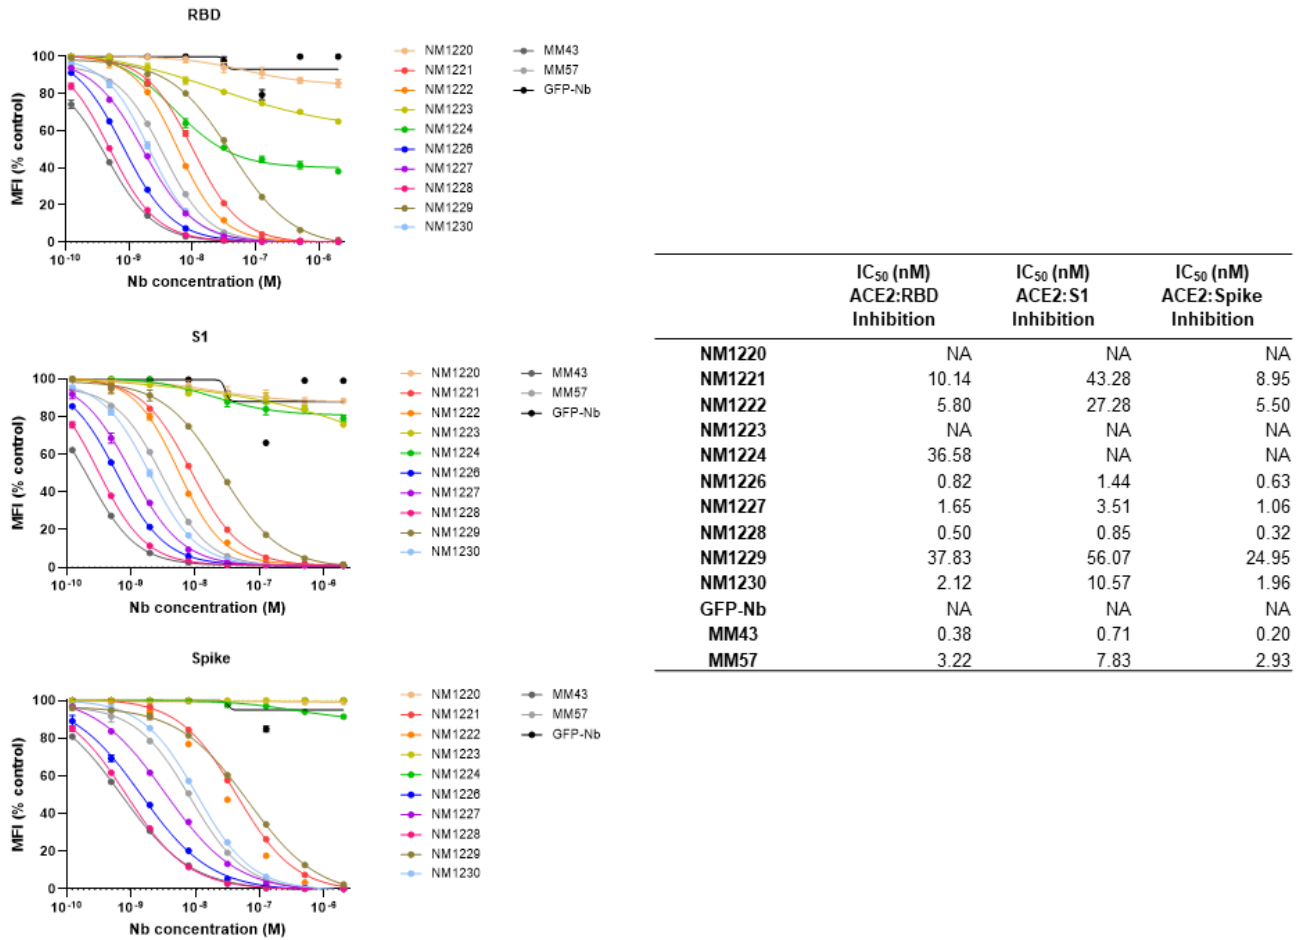

580

581 **Figure 3: Inhibitory Nbs identified by multiplex binding assay**

582 Results from bead-based multiplex ACE2 competition assay are shown for the three SARS-  
 583 CoV-2 spike-derived antigens, RBD, S1 and homotrimeric spike. ACE2 bound to the respective  
 584 antigen was detected. For each Nb, a dilution series from 2.106 μM to 0.123 nM is shown in  
 585 the presence of 80 ng/mL ACE2. MFI signals were normalized to the maximal signal per  
 586 antigen as given by the ACE2-only control. IC<sub>50</sub> values were calculated from a four-parametric  
 587 sigmoidal model and are displayed for each Nb and antigen. Data is presented as mean +/-  
 588 SD of three technical replicates (n =3).

589

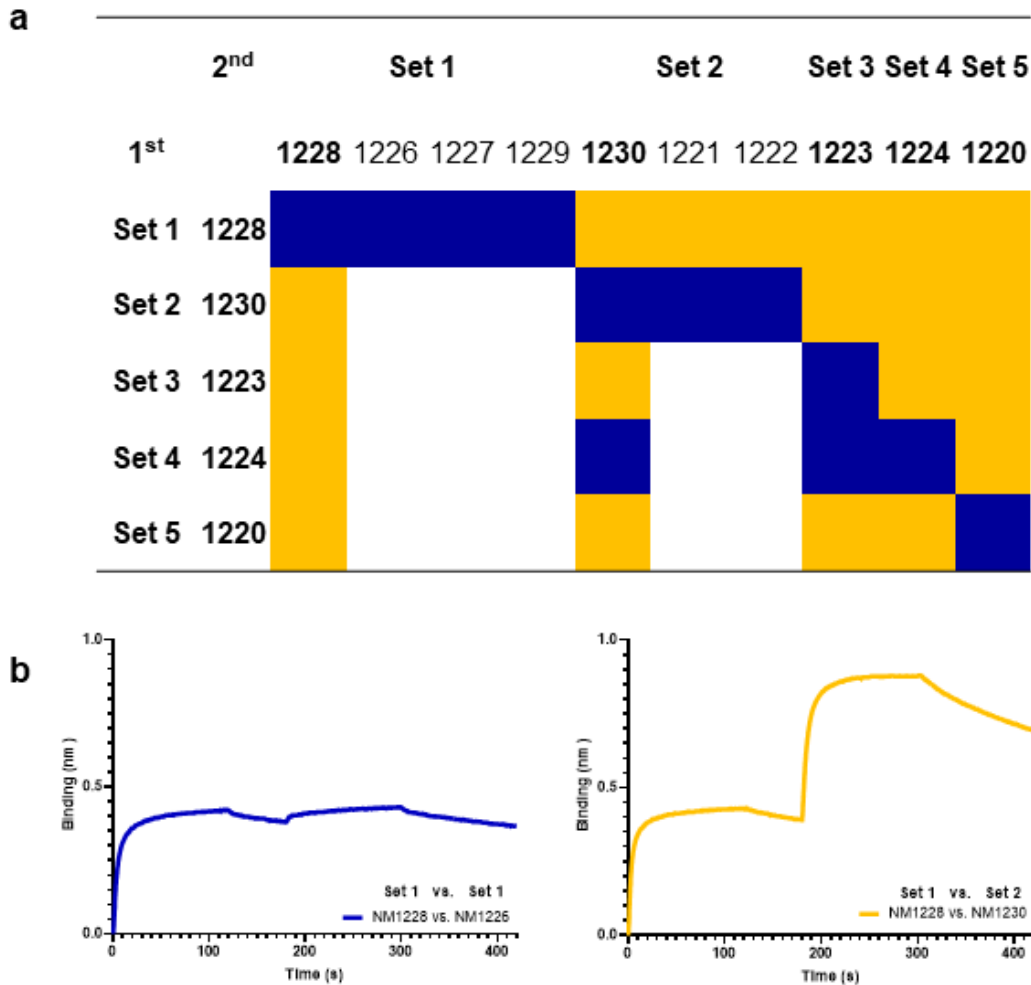

590

591 **Figure 4 RBD epitope binning of Nbs by biolayer interferometry**

592 (A) Heat map illustration of competitive Nb epitope binning on RBD using biolayer  
593 interferometry. Rows and columns represent the loading of the first and second Nb,  
594 respectively. Blue colored squares illustrate no additional binding of the second Nb meaning  
595 both Nbs belong to the same Nb-Set. Orange colored squares represent additional binding of  
596 the second Nb, hence these Nbs belong to different Nb-Sets. (B) Representative sensograms  
597 of single measurements of Nbs affiliated to the same Nb-Set (NM1228/ NM1226, blue) and to  
598 different Nb-Sets (NM1228/ NM1230, orange) are shown.

599

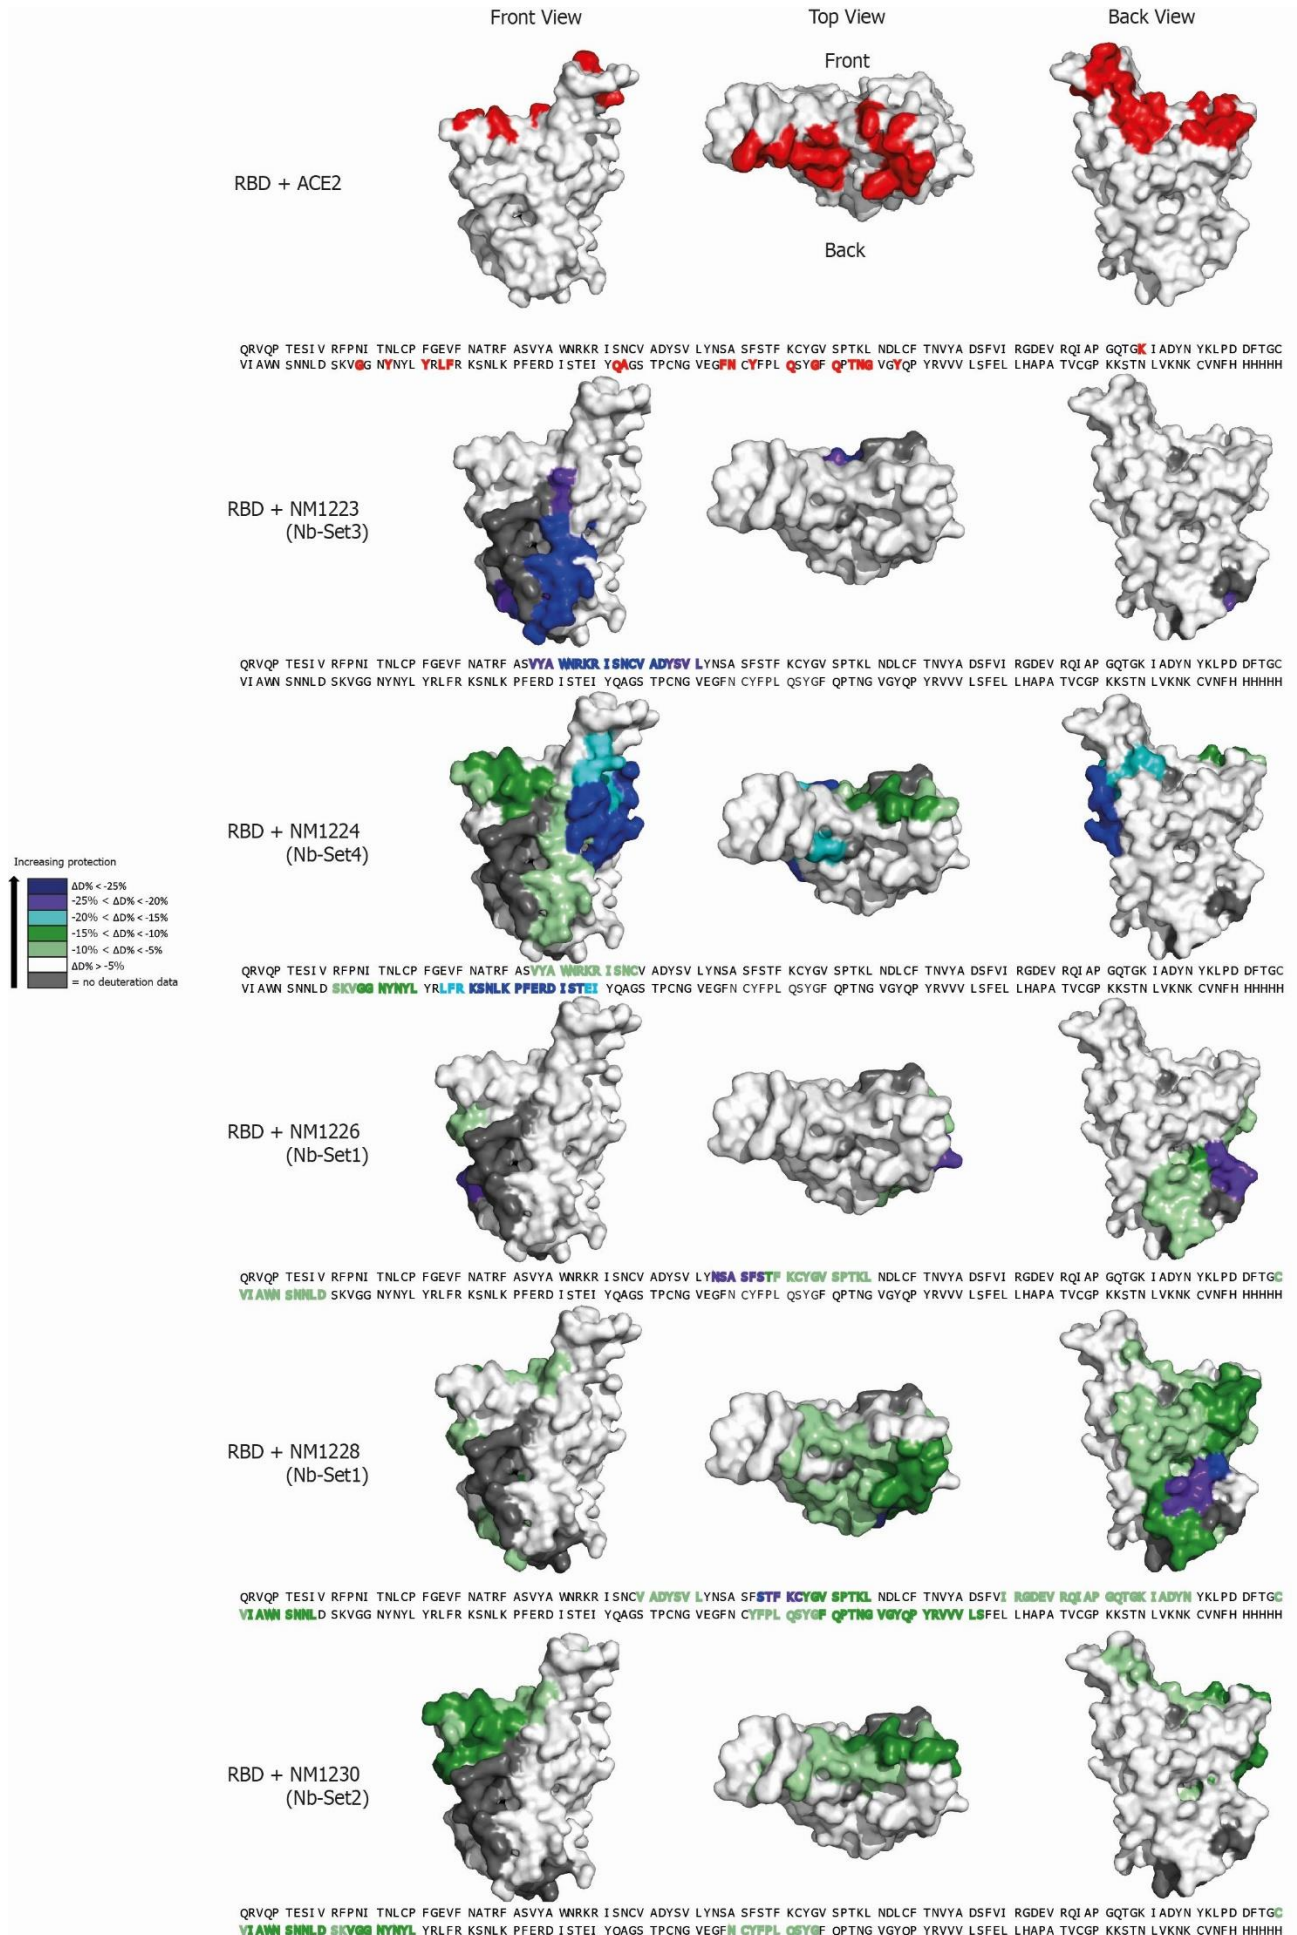

601 **Figure 5: Detailed epitope mapping of Nbs by HDX mass spectrometry**

602 Surface structure model of the RBD showing the ACE2 interface and the HDX-MS epitope  
603 mapping results of NM1223, NM1224, NM1226, NM1228, NM1230. Amino acid residues of  
604 RBD (PDB 6M17<sup>2</sup>) involved in the RBD:ACE2 interaction site<sup>2,35</sup> are shown in red (top panel).  
605 RBD epitopes protected upon Nb binding are highlighted in different colors indicating the  
606 strength of protection. Amino acid residues which are part of the Nb epitopes are highlighted  
607 in the RBD sequence.

608

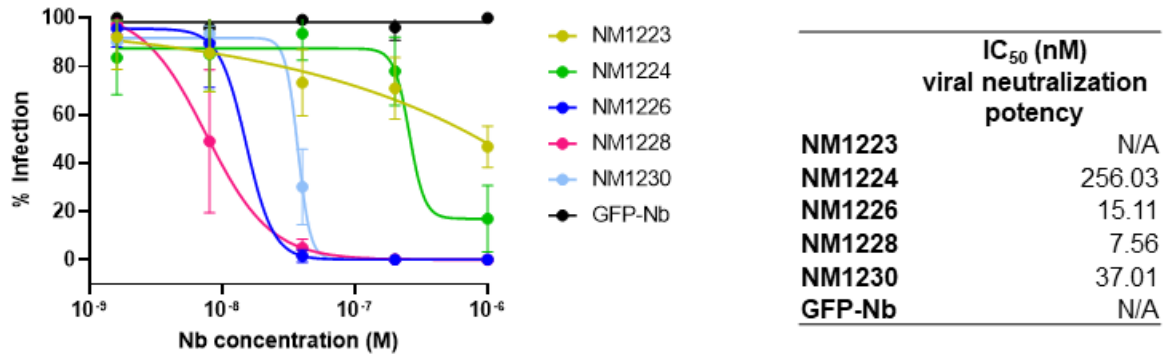

609

610 **Figure 6: Viral neutralization potency of selected Nbs**

611 (A) Neutralization of the SARS-CoV-2-mNG strain was analyzed in Caco-2 cells using serial  
612 dilutions of NM1223, NM1224, NM1226, NM1228 and NM1230. As negative control GFP-Nb  
613 was used. 48 h post-infection neutralization potency was visualized via Hoechst staining and  
614 mNeonGreen expression. Infection rate normalized to virus-only infection control are illustrated  
615 as percent of infection. IC<sub>50</sub> values were calculated from a four-parametric sigmoidal model  
616 and are displayed for each Nb. Data is presented as mean +/- SD of three biological replicates  
617 (N = 3).

618

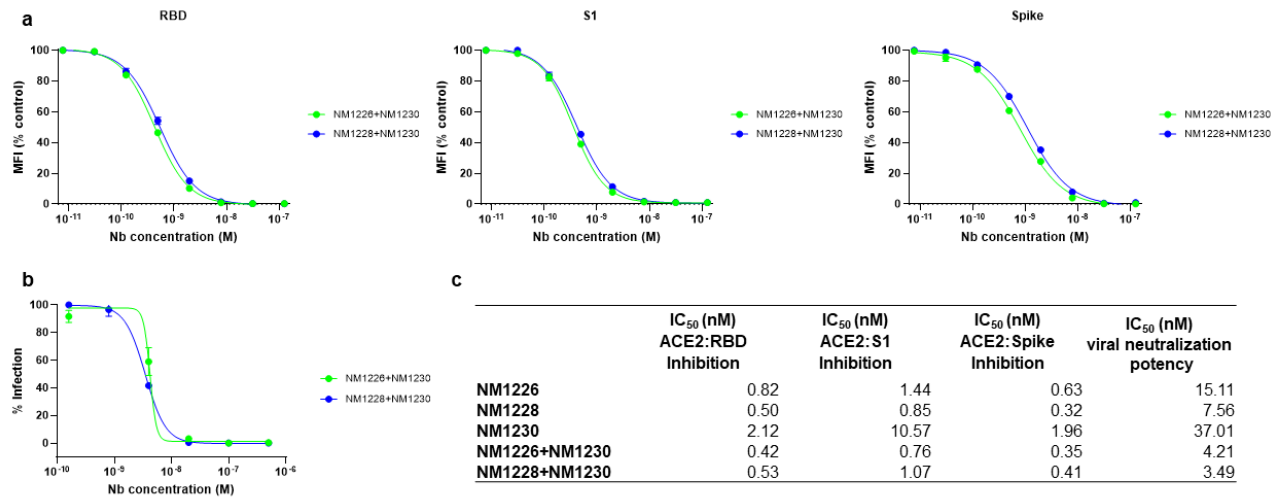

619

## 620 **Figure 7: Combinatorial application of RBD Nbs**

621 (A) Results from multiplex ACE2 competition assay are shown for the three spike-derived  
 622 antigens: RBD, S1 and homotrimeric spike. Nb combinations were diluted from 126 nM to 7.69  
 623 pM per Nb in the presence of 80 ng/mL ACE2 and antigen-bound ACE2 was measured. MFI  
 624 signals were normalized to the maximum detectable signal per antigen given by the ACE2-  
 625 only control. IC<sub>50</sub> values were calculated from a four-parametric sigmoidal model. Data are  
 626 presented as mean +/- SD of three technical replicates (n = 3). (B) Neutralization potency of  
 627 Nb-Set1 (NM1226, NM1228) in combination with Nb-Set2 (NM1230) was analyzed in Caco-2  
 628 cells using the SARS-CoV-2-mNG strain. 48 h post-infection, neutralization potency was  
 629 visualized via Hoechst staining and mNeonGreen expression. Infection rate normalized to  
 630 virus-only infection control are illustrated as percent of infection. IC<sub>50</sub> values were calculated  
 631 from a four-parametric sigmoidal model and are displayed for each Nb. Data are presented as  
 632 mean +/- SD of two biological replicates (N = 2). (C) Table summarizing the IC<sub>50</sub> values  
 633 obtained for the individual Nbs (as shown in **Figure 3** and **Figure 6**) and the Nb combinations.

634

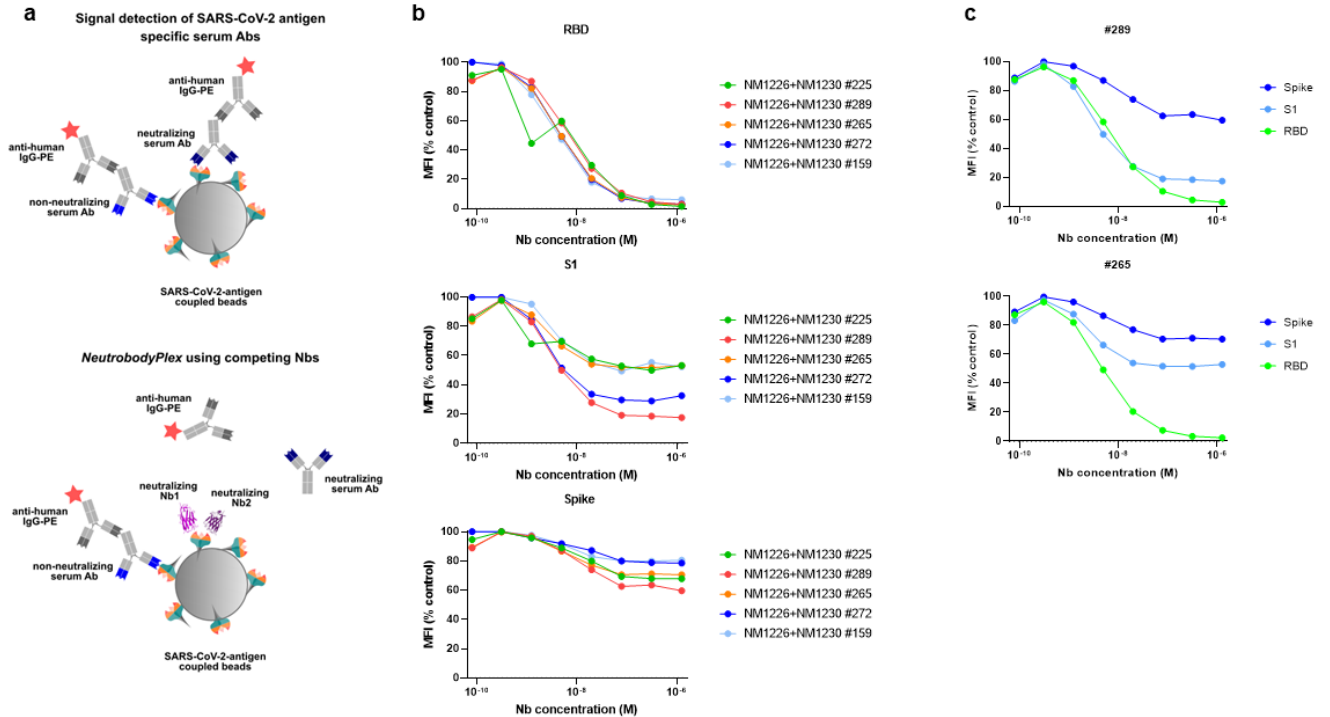

635

636 **Figure 8: NeutrobodyPlex - multiplex competitive binding assay to monitor a**  
 637 **neutralizing immune response in patients**

638 **(A)** Schematic illustration of the NeutrobodyPlex. The replacement of neutralizing IgGs from  
 639 patient serum from binding to SARS-CoV-2 derived antigens upon addition of RBD Nbs is  
 640 measured. In presence of neutralizing IgGs, the fluorescent signal from anti-human-IgG-PE, is  
 641 inversely proportional to the applied Nb concentration. **(B)** For the NeutrobodyPlex, serial  
 642 dilutions (1.26  $\mu$ M to 7.69 pM per Nb) of the combination NM1226/ NM1230 were incubated  
 643 with five serum samples followed by detection of bound human IgGs. MFI signals obtained for  
 644 all three spike-derived antigens (RBD, S1 domain, homotrimeric spike) normalized to serum-  
 645 only control are shown. **(C)** For two serum samples (#289, #265) differences in competition  
 646 efficiency of NM1226/ NM1230 between the three spike-derived antigens is shown.

647

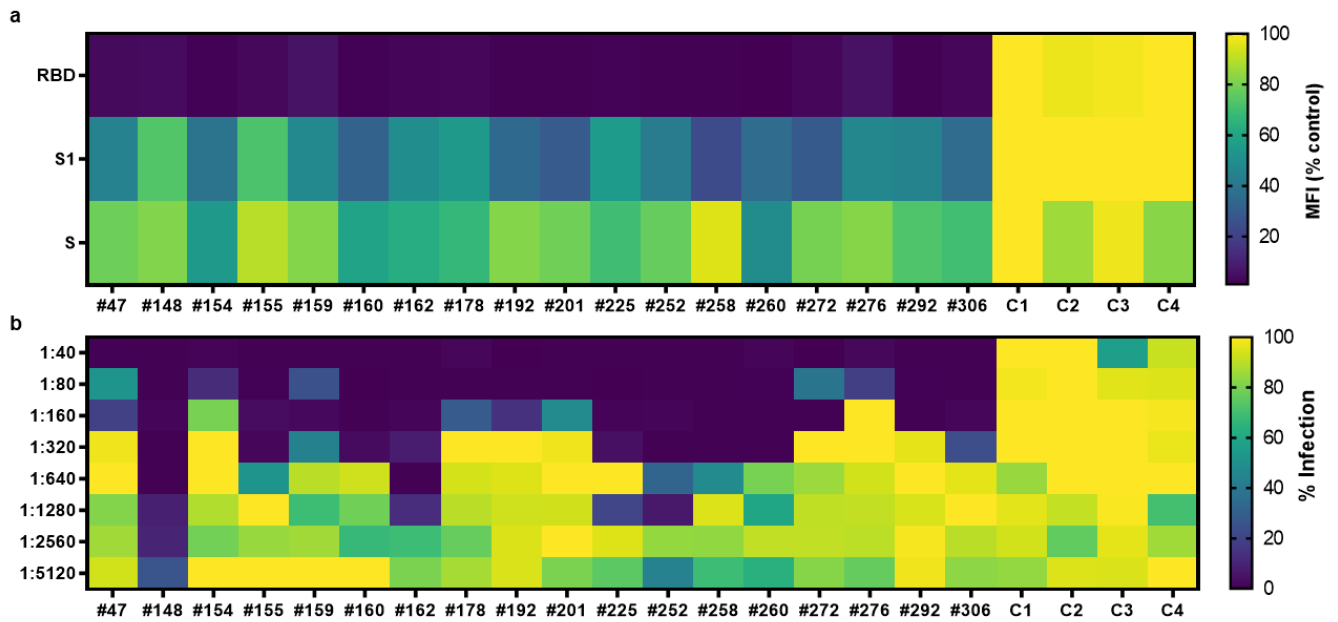

648

649 **Figure 9: Validation of the NeutrobodyPlex by testing patient samples in comparison to**  
650 **viral infection assay**

651 **(A)** 18 serum samples from SARS-CoV-2 convalescent patients and four from healthy donors  
652 (C1-4) were analyzed using the NeutrobodyPlex with fixed concentration of the Nb combination  
653 NM1226/ NM1230 (1.26  $\mu$ M per Nb). MFI values normalized to serum only control are  
654 illustrated as heat map graphic. Dark blue color-coding represents the loss of the detectable  
655 signal, meaning a strong shift of serum antibodies into the unbound state by off-competition of  
656 Nbs. Yellow color-coding represents no signal differences in presence or absence of Nbs.

657 **(B)** The same serum samples were analyzed using the viral infection assay. By infecting Caco-  
658 2 cells with the icSARS-CoV-2-mNG strain in presence of serial dilutions of the serum samples  
659 (1:40-1:5120), the neutralization potency was determined via Hoechst staining and  
660 mNeonGreen expression 48 h post-infection. Infection rate normalized to virus-only infection  
661 control are illustrated as percent of infection in a heat map graphic. Dark blue color-coding  
662 represents low mNeonGreen signal, meaning the presence of neutralizing serum antibodies.  
663 Yellow color-coding represents high mNeonGreen signal, indicating a lower inhibition of viral  
664 infection.

665



666 **References**

- 667 1 Rogers, T. F. *et al.* Isolation of potent SARS-CoV-2 neutralizing antibodies and  
668 protection from disease in a small animal model. *Science* **369**, 956-963,  
669 doi:10.1126/science.abc7520 (2020).
- 670 2 Yan, R. *et al.* Structural basis for the recognition of SARS-CoV-2 by full-length human  
671 ACE2. *Science* **367**, 1444-1448, doi:10.1126/science.abb2762 (2020).
- 672 3 Ju, B. *et al.* Human neutralizing antibodies elicited by SARS-CoV-2 infection. *Nature*  
673 **584**, 115-119, doi:10.1038/s41586-020-2380-z (2020).
- 674 4 Tai, W. *et al.* Characterization of the receptor-binding domain (RBD) of 2019 novel  
675 coronavirus: implication for development of RBD protein as a viral attachment inhibitor  
676 and vaccine. *Cell Mol Immunol* **17**, 613-620, doi:10.1038/s41423-020-0400-4 (2020).
- 677 5 Muyldermans, S. Nanobodies: natural single-domain antibodies. *Annu Rev Biochem*  
678 **82**, 775-797, doi:10.1146/annurev-biochem-063011-092449 (2013).
- 679 6 Wrapp, D. *et al.* Structural Basis for Potent Neutralization of Betacoronaviruses by  
680 Single-Domain Camelid Antibodies. *Cell*, doi:10.1016/j.cell.2020.04.031 (2020).
- 681 7 Huo, J. *et al.* Neutralizing nanobodies bind SARS-CoV-2 spike RBD and block  
682 interaction with ACE2. *Nat Struct Mol Biol*, doi:10.1038/s41594-020-0469-6 (2020).
- 683 8 Schoof, M. *et al.* An ultra-high affinity synthetic nanobody blocks SARS-CoV-2 infection  
684 by locking Spike into an inactive conformation. *bioRxiv*,  
685 doi:10.1101/2020.08.08.238469 (2020).
- 686 9 Chi, X. *et al.* Humanized Single Domain Antibodies Neutralize SARS-CoV-2 by  
687 Targeting Spike Receptor Binding Domain. *bioRxiv*, 2020.2004.2014.042010,  
688 doi:10.1101/2020.04.14.042010 (2020).
- 689 10 Hanke, L. *et al.* An alpaca nanobody neutralizes SARS-CoV-2 by blocking receptor  
690 interaction. *bioRxiv*, 2020.2006.2002.130161, doi:10.1101/2020.06.02.130161 (2020).
- 691 11 Esparza, T. J., Martin, N. P., Anderson, G. P., Goldman, E. R. & Brody, D. L. High  
692 Affinity Nanobodies Block SARS-CoV-2 Spike Receptor Binding Domain Interaction

- 693 with Human Angiotensin Converting Enzyme. *bioRxiv*, 2020.2007.2024.219857,  
694 doi:10.1101/2020.07.24.219857 (2020).
- 695 12 Nieto, G. V. *et al.* Fast isolation of sub-nanomolar affinity alpaca nanobody against the  
696 Spike RBD of SARS-CoV-2 by combining bacterial display and a simple single-step  
697 density gradient selection. *bioRxiv*, 2020.2006.2009.137935,  
698 doi:10.1101/2020.06.09.137935 (2020).
- 699 13 Xiang, Y. *et al.* Versatile, Multivalent Nanobody Cocktails for Highly Efficient SARS-  
700 CoV-2 Neutralization. *bioRxiv*, 2020.2008.2024.264333,  
701 doi:10.1101/2020.08.24.264333 (2020).
- 702 14 Gai, J. *et al.* A potent neutralizing nanobody against SARS-CoV-2 with inhaled delivery  
703 potential. *bioRxiv*, 2020.2008.2009.242867, doi:10.1101/2020.08.09.242867 (2020).
- 704 15 Korber, B. *et al.* Spike mutation pipeline reveals the emergence of a more transmissible  
705 form of SARS-CoV-2. *bioRxiv*, 2020.2004.2029.069054,  
706 doi:10.1101/2020.04.29.069054 (2020).
- 707 16 Korber, B. *et al.* Tracking Changes in SARS-CoV-2 Spike: Evidence that D614G  
708 Increases Infectivity of the COVID-19 Virus. *Cell* **182**, 812-827 e819,  
709 doi:10.1016/j.cell.2020.06.043 (2020).
- 710 17 Cao, Y. *et al.* Potent Neutralizing Antibodies against SARS-CoV-2 Identified by High-  
711 Throughput Single-Cell Sequencing of Convalescent Patients' B Cells. *Cell* **182**, 73-84  
712 e16, doi:10.1016/j.cell.2020.05.025 (2020).
- 713 18 Chi, X. *et al.* A neutralizing human antibody binds to the N-terminal domain of the Spike  
714 protein of SARS-CoV-2. *Science* **369**, 650-655, doi:10.1126/science.abc6952 (2020).
- 715 19 Amanat, F. *et al.* A serological assay to detect SARS-CoV-2 seroconversion in humans.  
716 *Nat Med* **26**, 1033-1036, doi:10.1038/s41591-020-0913-5 (2020).
- 717 20 Becker, M. *et al.* Going beyond clinical routine in SARS-CoV-2 antibody testing - A  
718 multiplex corona virus antibody test for the evaluation of cross-reactivity to endemic  
719 coronavirus antigens. *medRxiv*, 2020.2007.2017.20156000,  
720 doi:10.1101/2020.07.17.20156000 (2020).

- 721 21 Gorshkov, K. *et al.* Quantum Dot-Conjugated SARS-CoV-2 Spike Pseudo-Virions  
722 Enable Tracking of Angiotensin Converting Enzyme 2 Binding and Endocytosis. *ACS*  
723 *Nano*, doi:10.1021/acsnano.0c05975 (2020).
- 724 22 Lassaunière, R. *et al.* Evaluation of nine commercial SARS-CoV-2 immunoassays.  
725 *medRxiv*, 2020.2004.2009.20056325, doi:10.1101/2020.04.09.20056325 (2020).
- 726 23 Robbiani, D. F. *et al.* Convergent antibody responses to SARS-CoV-2 in convalescent  
727 individuals. *Nature* **584**, 437-442, doi:10.1038/s41586-020-2456-9 (2020).
- 728 24 Roxhed, N. *et al.* A translational multiplex serology approach to profile the prevalence  
729 of anti-SARS-CoV-2 antibodies in home-sampled blood. *medRxiv*,  
730 2020.2007.2001.20143966, doi:10.1101/2020.07.01.20143966 (2020).
- 731 25 Muruato, A. E. *et al.* A high-throughput neutralizing antibody assay for COVID-19  
732 diagnosis and vaccine evaluation. *Nat Commun* **11**, 4059, doi:10.1038/s41467-020-  
733 17892-0 (2020).
- 734 26 Rothbauer, U. Speed up to find the right ones: rapid discovery of functional nanobodies.  
735 *Nat Struct Mol Biol* **25**, 199-201, doi:10.1038/s41594-018-0038-4 (2018).
- 736 27 Tan, C. W. *et al.* A SARS-CoV-2 surrogate virus neutralization test based on antibody-  
737 mediated blockage of ACE2-spike protein-protein interaction. *Nat Biotechnol* **38**, 1073-  
738 1078, doi:10.1038/s41587-020-0631-z (2020).
- 739 28 Arbabi Ghahroudi, M., Desmyter, A., Wyns, L., Hamers, R. & Muyldermans, S.  
740 Selection and identification of single domain antibody fragments from camel heavy-  
741 chain antibodies. *FEBS Lett* **414**, 521-526, doi:10.1016/s0014-5793(97)01062-4  
742 (1997).
- 743 29 Kirchhofer, A. *et al.* Modulation of protein properties in living cells using nanobodies.  
744 *Nat Struct Mol Biol* **17**, 133-138, doi:10.1038/nsmb.1727 (2010).
- 745 30 Rothbauer, U. *et al.* A versatile nanotrap for biochemical and functional studies with  
746 fluorescent fusion proteins. *Mol Cell Proteomics* **7**, 282-289,  
747 doi:10.1074/mcp.M700342-MCP200 (2008).

- 748 31 Rothbauer, U. *et al.* Targeting and tracing antigens in live cells with fluorescent  
749 nanobodies. *Nat Methods* **3**, 887-889, doi:10.1038/nmeth953 (2006).
- 750 32 Stadlbauer, D. *et al.* SARS-CoV-2 Seroconversion in Humans: A Detailed Protocol for  
751 a Serological Assay, Antigen Production, and Test Setup. *Curr Protoc Microbiol* **57**,  
752 e100, doi:10.1002/cpmc.100 (2020).
- 753 33 Kochert, B. A., Iacob, R. E., Wales, T. E., Makriyannis, A. & Engen, J. R. Hydrogen-  
754 Deuterium Exchange Mass Spectrometry to Study Protein Complexes. *Methods Mol*  
755 *Biol* **1764**, 153-171, doi:10.1007/978-1-4939-7759-8\_10 (2018).
- 756 34 Hamuro, Y. & Coales, S. J. Optimization of Feasibility Stage for Hydrogen/Deuterium  
757 Exchange Mass Spectrometry. *J Am Soc Mass Spectrom* **29**, 623-629,  
758 doi:10.1007/s13361-017-1860-3 (2018).
- 759 35 Lan, J. *et al.* Structure of the SARS-CoV-2 spike receptor-binding domain bound to the  
760 ACE2 receptor. *Nature* **581**, 215-220, doi:10.1038/s41586-020-2180-5 (2020).
- 761
